# Supplementary material for: Quantitative Genetics and Modularity in Cranial and Mandibular Morphology of Calomys expulsus
Source: Springer Nature journal article supplement (doi:10.1007/s11692-014-9293-4), 2014-08-26
Supplement: 11692_2014_9293_MOESM1_ESM.pdf [file 11692_2014_9293_MOESM1_ESM.pdf]

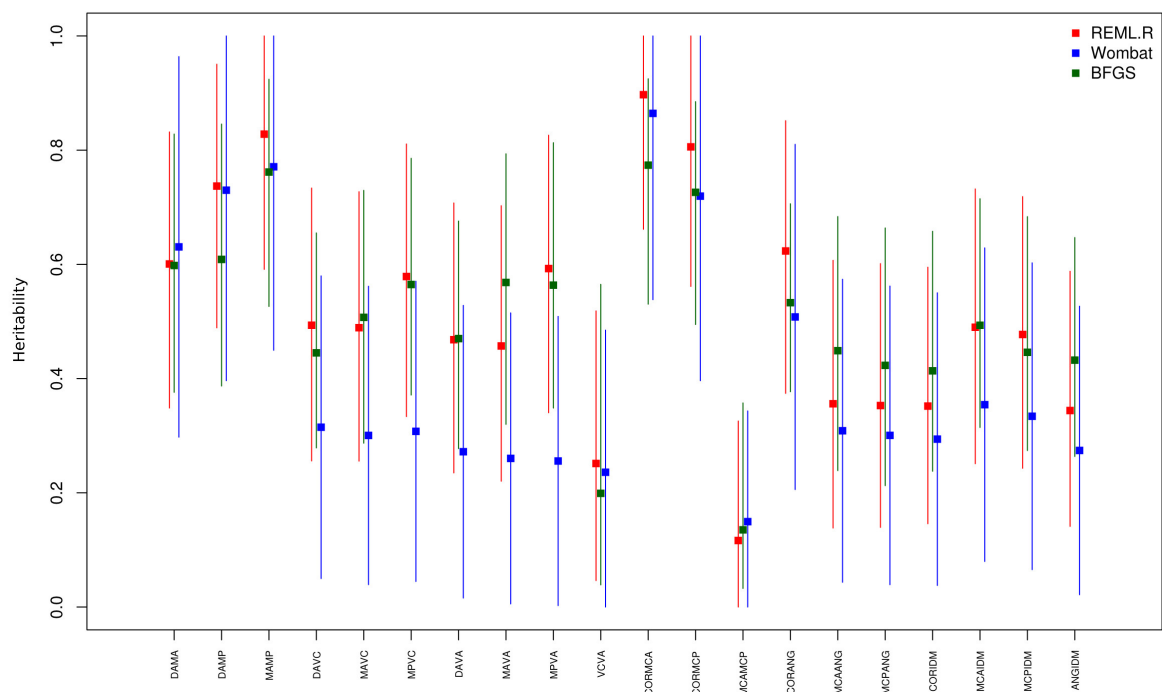

Figure S2: Heritabilities and associated intervals for mandibular traits, obtained from three different  $G$ -matrix estimation algorithms. For both Wombat and the REML algorithm written in R, intervals refer to a normal approximation of the likelihood function; for BFGS, intervals are obtained from the posterior distribution of  $G$ -matrices.

Table S1: Descriptive statistics, repeatabilities, and effective sample size for cranial traits.

|         | Mean    | Variance | CV     | Repeatability | $N_{eff}$ |
|---------|---------|----------|--------|---------------|-----------|
| ISPM    | 4.7831  | 0.4169   | 0.1350 | 0.9813        | 20.7315   |
| PMZS    | 6.7766  | 0.8043   | 0.1323 | 0.9900        | 18.9310   |
| PMZI    | 8.8525  | 1.1411   | 0.1207 | 0.9931        | 14.0073   |
| PMMT    | 7.0880  | 0.3556   | 0.0841 | 0.9823        | 21.0701   |
| MTPNS   | 1.6680  | 0.0223   | 0.0894 | 0.6538        | 29.7420   |
| ISPNS   | 11.7723 | 1.5909   | 0.1071 | 0.9937        | 31.2796   |
| NSLZI   | 14.7935 | 3.2506   | 0.1219 | 0.9978        | 17.8501   |
| ISNSL   | 3.0014  | 0.2001   | 0.1490 | 0.9722        | 7.6078    |
| NSLNA   | 9.3617  | 1.6327   | 0.1365 | 0.9942        | 23.6907   |
| NSLZS   | 12.1392 | 2.3570   | 0.1265 | 0.9971        | 21.0287   |
| NAPNS   | 8.0508  | 0.4377   | 0.0822 | 0.9920        | 17.4201   |
| PTZYGO  | 6.8091  | 0.6421   | 0.1177 | 0.9890        | 14.7499   |
| ZSZI    | 3.0291  | 0.3211   | 0.1871 | 0.9704        | 2.4434    |
| ZIMT    | 4.4680  | 0.4140   | 0.1440 | 0.9825        | 17.0637   |
| ZIZYGO  | 3.1533  | 0.2004   | 0.1420 | 0.9383        | 23.5841   |
| ZITSP   | 3.4402  | 0.3975   | 0.1833 | 0.9849        | 13.9055   |
| EAMZYGO | 3.8778  | 0.1540   | 0.1012 | 0.9509        | 36.1888   |
| ZYGOTSP | 3.8296  | 0.2861   | 0.1397 | 0.9662        | 6.0911    |
| PTTSP   | 4.1248  | 0.1232   | 0.0851 | 0.9578        | 23.1891   |
| NABR    | 7.7062  | 0.5475   | 0.0960 | 0.9749        | 16.2234   |
| BRPT    | 4.0049  | 0.0623   | 0.0623 | 0.8683        | 36.3455   |
| BRAPET  | 7.8848  | 0.2468   | 0.0630 | 0.9677        | 36.1158   |
| PTAPET  | 8.4384  | 0.5422   | 0.0873 | 0.9891        | 26.8944   |
| PTBA    | 11.2926 | 1.1548   | 0.0952 | 0.9947        | 23.4941   |
| PTEAM   | 8.6082  | 0.7725   | 0.1021 | 0.9911        | 19.4437   |
| LDAS    | 5.3572  | 0.0767   | 0.0517 | 0.8968        | 62.7865   |
| BRLD    | 7.1663  | 0.2042   | 0.0631 | 0.9572        | 47.7202   |
| OPILD   | 3.6473  | 0.3391   | 0.1597 | 0.9697        | 15.7402   |
| PTAS    | 7.8272  | 0.3809   | 0.0789 | 0.9743        | 31.2381   |
| JPAS    | 4.6982  | 0.3511   | 0.1261 | 0.9744        | 10.8988   |
| PNSAPET | 5.3178  | 0.5627   | 0.1411 | 0.9807        | 20.6741   |
| APETBA  | 3.6937  | 0.3099   | 0.1507 | 0.9691        | 16.4576   |
| APETTS  | 3.4693  | 0.0381   | 0.0563 | 0.7866        | 30.1533   |
| BAEAM   | 5.7093  | 0.1689   | 0.0720 | 0.9557        | 17.6073   |
| BAOPI   | 4.2967  | 0.0706   | 0.0618 | 0.9046        | 57.2964   |

Table S2: Descriptive statistics, repeatabilities, and effective sample sizes for mandibular traits. Basic statistics here refer only to the subset of 30 individuals used to estimate repeatability, except for the effective sample sizes; see 'Materials and Methods' for details

|        | Mean   | Variance | CV     | Repeatability | $N_{eff}$ |
|--------|--------|----------|--------|---------------|-----------|
| DAMA   | 3.1582 | 0.1396   | 0.1183 | 0.9425        | 46.0166   |
| DAMP   | 4.7575 | 0.2095   | 0.0962 | 0.9643        | 77.3228   |
| MAMP   | 1.6089 | 0.0207   | 0.0894 | 0.8788        | 111.2591  |
| DAVC   | 3.9638 | 0.2076   | 0.1150 | 0.9502        | 31.1409   |
| MAVC   | 3.1968 | 0.1695   | 0.1288 | 0.9739        | 31.4147   |
| MPVC   | 3.9326 | 0.2178   | 0.1187 | 0.9702        | 43.4467   |
| DAVA   | 2.2533 | 0.1142   | 0.1500 | 0.9396        | 28.7245   |
| MAVA   | 2.9556 | 0.1584   | 0.1347 | 0.9760        | 26.2380   |
| MPVA   | 4.2982 | 0.2168   | 0.1083 | 0.9845        | 44.1206   |
| VCVA   | 1.8208 | 0.0490   | 0.1215 | 0.9010        | 8.6261    |
| CORMCA | 1.4322 | 0.1103   | 0.2319 | 0.9635        | 137.3761  |
| CORMCP | 2.8385 | 0.2231   | 0.1664 | 0.9678        | 98.4473   |
| MCAMCP | 1.4438 | 0.0479   | 0.1516 | 0.9276        | 4.7604    |
| CORANG | 5.5261 | 0.9524   | 0.1766 | 0.9895        | 50.7683   |
| MCAANG | 4.3748 | 0.5434   | 0.1685 | 0.9902        | 16.9527   |
| MCPANG | 3.7203 | 0.3883   | 0.1675 | 0.9837        | 17.1653   |
| CORIDM | 6.1405 | 0.7929   | 0.1450 | 0.9921        | 18.1222   |
| MCAIDM | 6.0728 | 0.9212   | 0.1580 | 0.9921        | 30.2408   |
| MCPIDM | 6.6343 | 1.0551   | 0.1548 | 0.9911        | 29.3048   |
| ANGIDM | 4.9149 | 1.1668   | 0.2198 | 0.9916        | 17.4681   |

Table S3: Heritabilities estimated for latent traits under the BSFG model, along with 95% posterior intervals derived from the posterior distribution of  $h^2$ . Bold values indicate those  $h^2$  values whose posterior intervals do not contain the null value.

| $\lambda$ | Skull       |      |      | Mandible    |      |      |
|-----------|-------------|------|------|-------------|------|------|
|           | Mean        | PI-  | PI+  | Mean        | PI-  | PI+  |
| 1         | <b>0.30</b> | 0.11 | 0.51 | <b>0.65</b> | 0.38 | 0.94 |
| 2         | <b>0.44</b> | 0.18 | 0.72 | <b>0.83</b> | 0.61 | 0.99 |
| 3         | <b>0.51</b> | 0.22 | 0.84 | <b>0.50</b> | 0.20 | 0.82 |
| 4         | <b>0.79</b> | 0.53 | 0.99 | <b>0.83</b> | 0.59 | 0.99 |
| 5         | 0.63        | 0.00 | 0.97 | 0.10        | 0.00 | 0.41 |
| 6         | 0.11        | 0.00 | 0.36 | 0.27        | 0.00 | 0.77 |
| 7         | 0.08        | 0.00 | 0.37 | 0.14        | 0.00 | 0.49 |
| 8         | 0.15        | 0.00 | 0.45 | 0.41        | 0.00 | 0.86 |
| 9         | 0.28        | 0.00 | 0.67 | 0.05        | 0.00 | 0.29 |
| 10        | 0.08        | 0.00 | 0.38 | 0.49        | 0.00 | 0.90 |
| 11        | 0.24        | 0.00 | 0.54 | 0.45        | 0.00 | 0.89 |
| 12        | 0.38        | 0.00 | 0.71 | 0.43        | 0.00 | 0.95 |
| 13        | 0.32        | 0.00 | 0.88 | 0.17        | 0.00 | 0.86 |
| 14        | 0.34        | 0.00 | 0.62 | 0.31        | 0.00 | 0.90 |
| 15        | 0.47        | 0.00 | 0.86 | 0.21        | 0.00 | 0.86 |
| 16        | 0.10        | 0.00 | 0.67 | 0.13        | 0.00 | 0.77 |
| 17        | 0.01        | 0.00 | 0.00 | 0.05        | 0.00 | 0.45 |
